# Supplementary material
Source: PubMed Central journal article supplement (PMC2533691)
Supplement: NIHMS61145-supplement-si20060408_125.pdf [file NIHMS61145-supplement-si20060408_125.pdf]

## Supporting Information

For

### **“Synthesis and Thermodynamic Studies of Oligodeoxynucleotides Containing Tandem Lesions of Thymidine Glycol and 8-oxo-2'-Deoxyguanosine” by**

Yuesong Wang and Yinsheng Wang

(*Chem. Res. Toxicol.*, 2006, Vol. 19)

#### **Table of Contents**

1. Experimental procedures for the synthesis of the phosphoramidite building block of 8-oxodG.
2. <sup>1</sup>H- and <sup>31</sup>P-NMR spectra.
3. HPLC traces for the separation of synthesized ODNs.
4. ESI-MS & ESI-MS/MS characterization of synthesized ODNs containing Tg or 8-oxodG.
5. Thermodynamic studies of unmodified and single base lesion-bearing duplex ODNs.

## List of Figures in the Supporting Information

**Scheme S1.** Synthesis of phosphoramidite building block of 8-oxodG.

**Figure S1.**  $^1\text{H}$  NMR spectrum of **1** (400 MHz,  $\text{DMSO-}d_6$ ).

**Figure S2.**  $^1\text{H}$  NMR spectrum of **2** (300 MHz,  $\text{CDCl}_3$ ).

**Figure S3.**  $^1\text{H}$  NMR spectrum of **3** (400 MHz,  $\text{CDCl}_3$ ).

**Figure S4.**  $^1\text{H}$  NMR spectrum of **4** (400 MHz,  $\text{CDCl}_3$ ).

**Figure S5.**  $^1\text{H}$  NMR spectrum of **5** (400 MHz,  $\text{CDCl}_3$ ).

**Figure S6.**  $^{31}\text{P}$  NMR spectrum of **6** (400 MHz,  $\text{CDCl}_3$ ).

**Figure S7.**  $^1\text{H}$  NMR spectrum of 8-bromo-2'-deoxyguanosine (300 MHz,  $\text{DMSO-}d_6$ ).

**Figure S8.**  $^1\text{H}$  NMR spectrum of 8-benzyloxy-2'-deoxyguanosine (500 MHz,  $\text{DMSO-}d_6$ ).

**Figure S9.**  $^1\text{H}$  NMR of 8-oxo-2'-deoxyguanosine (300 MHz,  $\text{DMSO-}d_6$ ).

**Figure S10.**  $^1\text{H}$  NMR of 2-N-(phenoxyacetyl)-8-oxo-2'-deoxyguanosine (500 MHz,  $\text{DMSO-}d_6$ ).

**Figure S11.**  $^{31}\text{P}$  NMR of **7** (400 MHz,  $\text{CDCl}_3$ ).

**Figure S12.** HPLC traces for the separation of the synthesized ODNs: (a) d(ATGGCGTgGCTAT); (b) d(ATGGC\*GTGCTAT), (c) d(ATGGCTg\*GGCTAT).

**Figure S13.** ESI-MS & MS/MS characterizations of d(ATGGCGTgGCTAT). (a) Negative-ion ESI-MS; (b) product-ion spectrum of the  $[\text{M} - 3\text{H}]^{3-}$  ion ( $m/z$  1235).

**Figure S14.** ESI-MS & MS/MS characterizations of d(ATGGC\*GTGCTAT). (a) Negative-ion ESI-MS; (b) product-ion spectrum of the  $[\text{M} - 3\text{H}]^{3-}$  ion ( $m/z$  1229).

**Figure S15.** ESI-MS & MS/MS characterizations of d(ATGGCTgG\*GCTAT): (a) Negative-ion ESI-MS; (b) product-ion spectrum of  $[\text{M} - 3\text{H}]^{3-}$  ion ( $m/z$  1241).

**Figure S16.** Plot of  $1/T_m$  vs.  $\ln(C_i/4)$  for the unmodified duplexes. The duplex is d(ATGGCXYGCTAT)/d(ATAGCMNGCCAT), where XY/MN represents GT/AC(■), GT/AA(●), TG/CA(▲).

**Figure S17.** Plot of  $1/T_m$  vs  $\ln(C_i/4)$  for the duplexes including single damaged lesion. The duplex is d(ATGGCXYGCTAT)/d(ATAGCMNGCCAT), where XY/MN represents G\*T/AC(■), G\*T/AA(●), GTg/AC(▲).

## Synthesis of 8-oxo-2'-deoxyguanosine Phosphoramidite Building Block

The title compound was synthesized according to reported procedures<sup>1-3</sup>.

### 8-bromo-2'-deoxyguanosine<sup>1</sup>

8-Bromo-2'-deoxyguanosine was prepared according to the procedure reported by Scharer et al.<sup>1</sup>

<sup>1</sup>H NMR (300 MHz, DMSO-*d*<sub>6</sub>): δ (ppm) 10.78 (s, 1H, N1-H), 6.48 (s, 2H), 6.15 (t, *J* = 7.8 Hz), 4.39 (m, 1H), 3.80 (m, 1H), 3.60 (dd, *J* = 5.2, 11.8 Hz, 1H), 3.50 (dd, *J* = 5.9, 11.6 Hz, 1H), 3.16 (m, 1H), 2.09 (m, 1H); ESI-MS: *m/z* 343.9 [M – H]<sup>–</sup>.

### 8-benzyloxy-2'-deoxyguanosine<sup>2</sup>

The title compound was synthesized using the procedure reported by Kumar et al.<sup>2</sup>

<sup>1</sup>H NMR (500 MHz, DMSO-*d*<sub>6</sub>): δ (ppm) 10.55 (s, 1H, N-H), 7.31-7.49 (m, 5H), 6.31 (s, 2H), 6.08 (t, *J* = 7.2 Hz), 5.40 (dd, *J* = 11.9, 17.3 Hz, 2H), 5.16 (d, *J* = 4.3 Hz, 1H), 4.77 (5, *J* = 6.0 Hz, 1H), 4.23 (m, 1H), 3.70 (m, 1H), 3.43 (m, 1H), 3.36 (m, 1H), 3.08 (br, 1H), 2.85 (m, 1H), 2.02 (m, 1H), 1.17 (t, *J* = 7.2 Hz, 1H); ESI-MS: *m/z* 372.1 [M – H]<sup>–</sup>.

### 8-oxo-2'-deoxyguanosine<sup>2</sup>

The title compound was synthesized using the procedure reported by Kumar et al.<sup>2</sup>

<sup>1</sup>H NMR (300 MHz, DMSO-*d*<sub>6</sub>): δ (ppm) 10.80 (br, 1H, N-H); 10.68 (s, 1H), 6.45 (br, 2H), 6.02 (t, *J* = 7.4 Hz, 1H), 4.85 (br, 2H), 4.32 (m, 1H), 3.74 (m, 1H), 3.56 (dd, *J* = 5.5, 11.7 Hz, 1H), 3.43 (dd, *J* = 5.5, 11.7 Hz, 1H), 2.97 (m, 1H), 1.92 (m, 1H); ESI-MS: *m/z* 282.1 [M – H]<sup>–</sup>.

### 2-*N*-(phenoxyacetyl)-8-oxo-2'-deoxyguanosine<sup>3</sup>

Phenoxyacetyl-protected 8-oxodeoxyguanosine was prepared according to the procedure described by Cadet et al.<sup>3</sup>

<sup>1</sup>H NMR (500 MHz, DMSO-*d*<sub>6</sub>) δ (ppm) 11.88 (br, 1H), 11.68 (br, 1H, N-H), 11.30 (s, 1H), 7.31 (t, *J* = 8.9 Hz, 2H), 6.98 (m, 3H), 6.08 (t, *J* = 7.3 Hz, 1H), 5.15 (d, *J* = 4.1 Hz, 1H), 4.85 (s, 2H), 4.70 (t, *J* = 5.5 Hz, 1H), 4.37 (m, 1H), 3.75 (m, 1H), 3.57 (m, 1H), 3.44 (m, 1H), 3.05 (m, 1H), 1.99 (m, 1H); ESI-MS: *m/z* 418.0 [M+H]<sup>+</sup>.

**5'-*O*-(4,4'-dimethoxytrityl)-2-*N*-(phenoxyacetyl)-8-oxo-2'-deoxyguanosine-3'-*O*-[(2-cyanoethyl)-*N,N*-diisopropyl-phosphoramidite (7)**

Compound 7 was prepared according to the procedure described by Cadet et al.<sup>3</sup>

<sup>31</sup>P-NMR (400 MHz, CDCl<sub>3</sub>): 149.56, 149.66. ESI-MS: *m/z* 942.3 [M+Na]<sup>+</sup>.

**References:**

1. Gillet, L. C. J.; Scharer, O. D., Preparation of C8-Amine and Acetylamine Adducts of 2'-Deoxyguanosine Suitably Protected for DNA Synthesis. *Org. Lett.* **2002**, 4, (24), 4205-4208.
2. Nampalli, S.; Kumar, S., Efficient synthesis of 8-Oxo-dGTP: A mutagenic nucleotide. *Bioorg. Med. Chem. Lett.* **2000**, 10, (15), 1677-1679.
3. Bourdat, A.-G.; Gasparutto, D.; Cadet, J., Synthesis and enzymic processing of oligodeoxynucleotides containing tandem base damage. *Nucleic Acids Res.* **1999**, 27, (4), 1015-1024.

**Scheme S1** Synthesis of 8-oxodG phosphoramidite building block

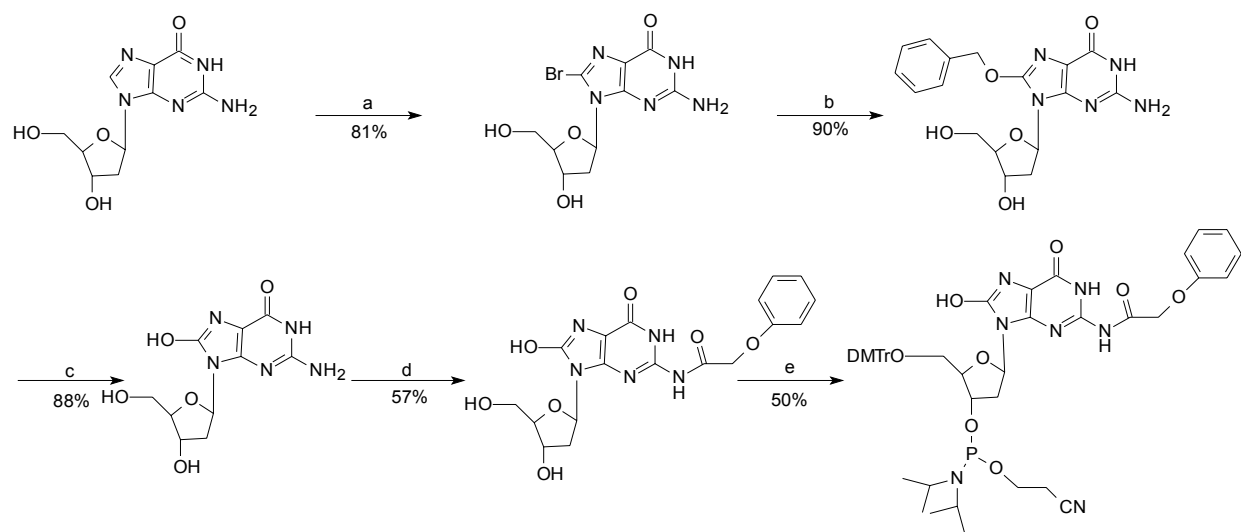

**Reagents:** (a) NBS/CH<sub>3</sub>CN/H<sub>2</sub>O; (b) Na/BnOH/DMSO; (c) 1.0 M HCl/CH<sub>3</sub>OH; (d) i, TMS/Pyridine; ii, Phenoxyacetyl chloride; (e) i, DMTrCl/Pyridine, ii, NC(CH<sub>2</sub>)<sub>2</sub>OP(Cl)N(*i*Pr)<sub>2</sub>/DIEA/CH<sub>2</sub>Cl<sub>2</sub>

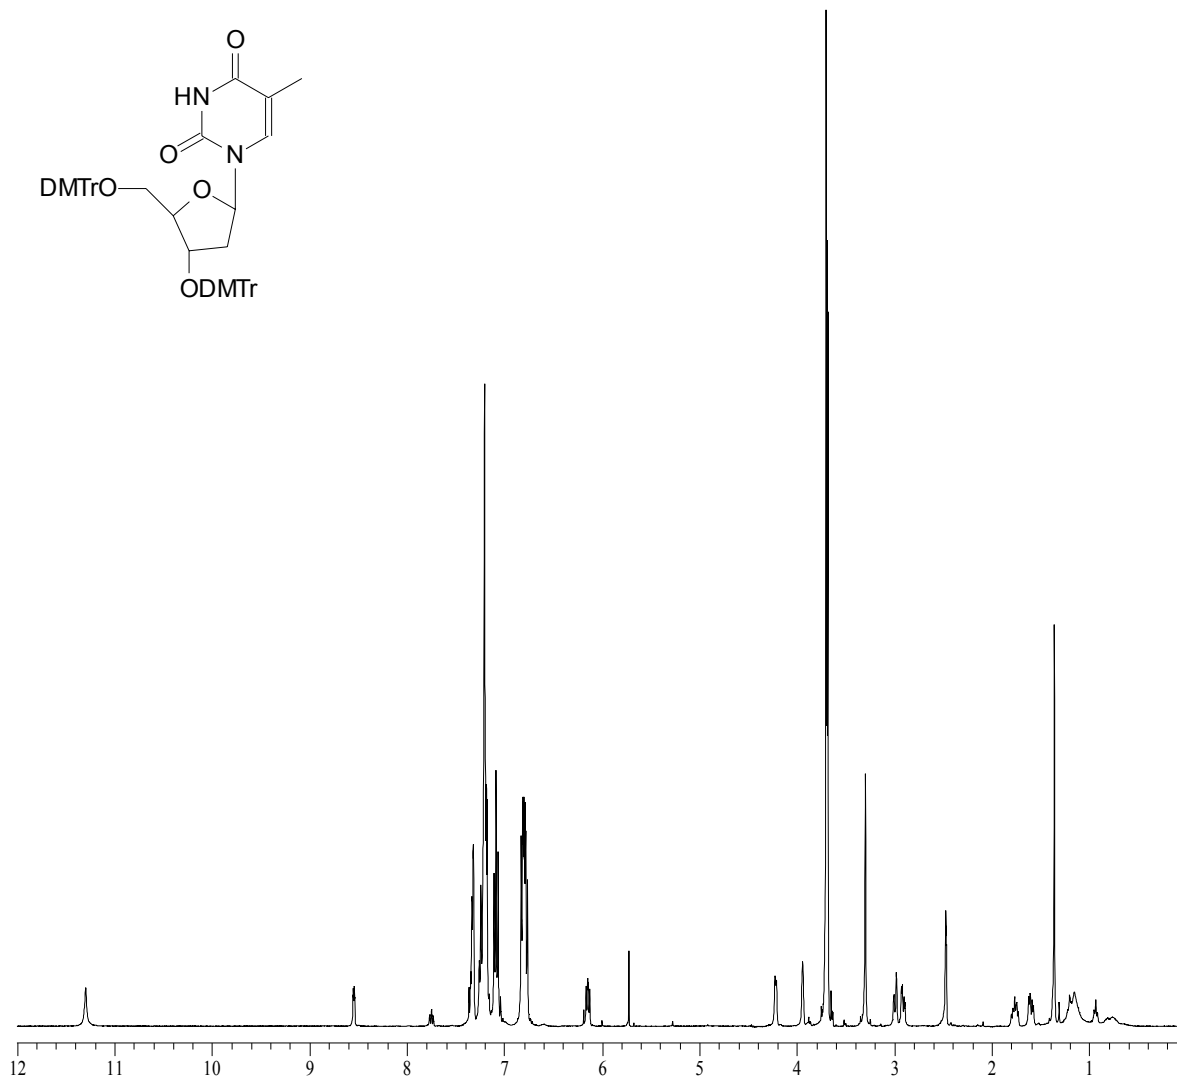

**Figure S1.**  $^1\text{H}$  NMR spectrum of **1** (400 MHz,  $\text{DMSO-}d_6$ ).

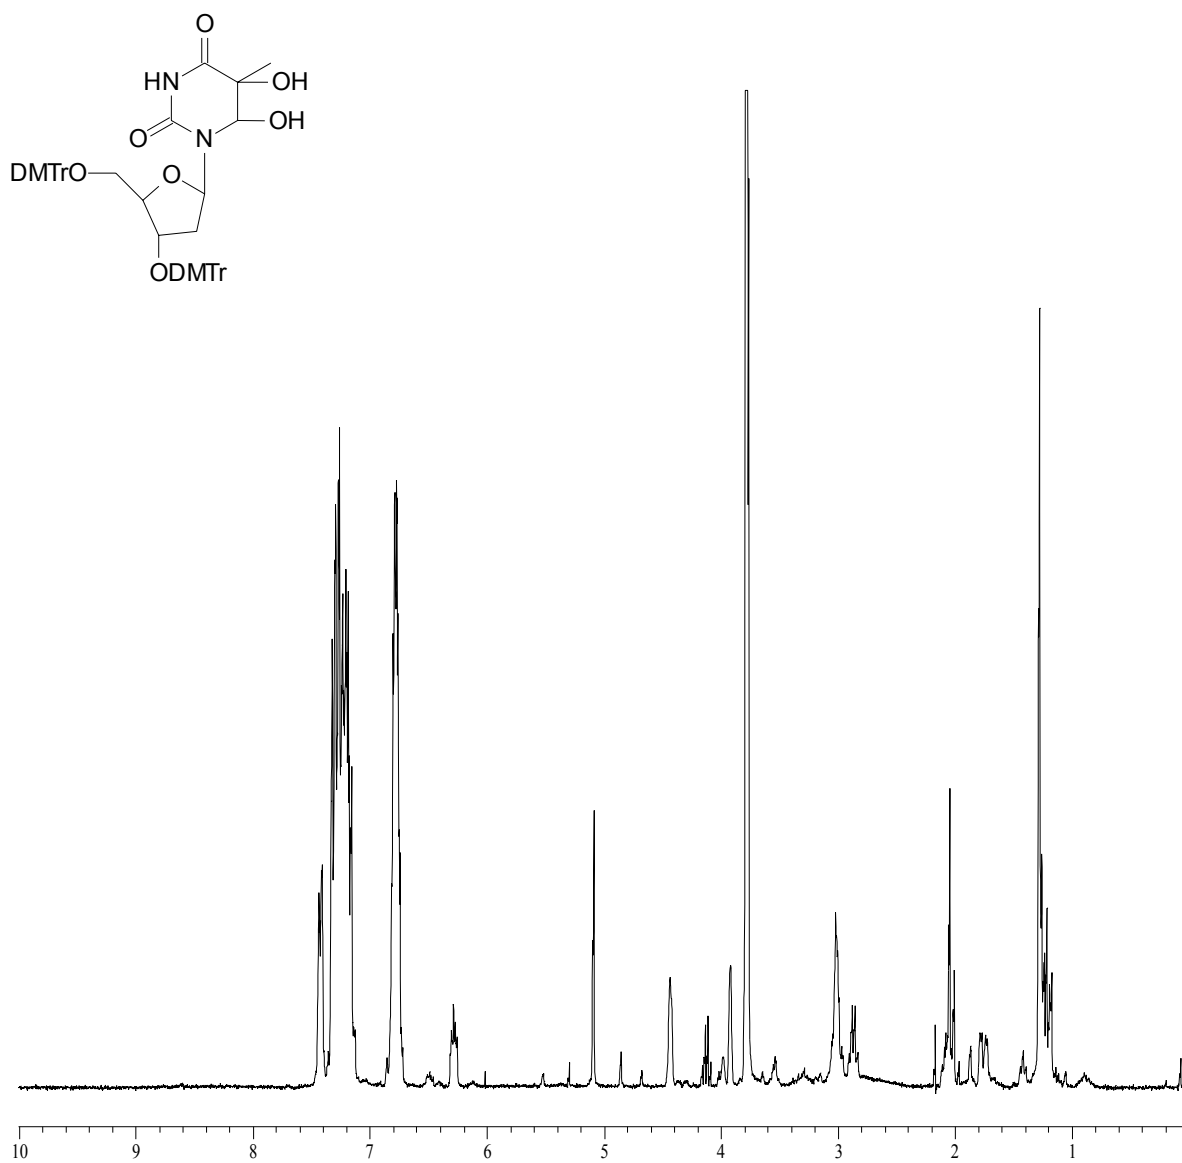

**Figure S2.** <sup>1</sup>H NMR spectrum of **2** (300 MHz, CDCl<sub>3</sub>).

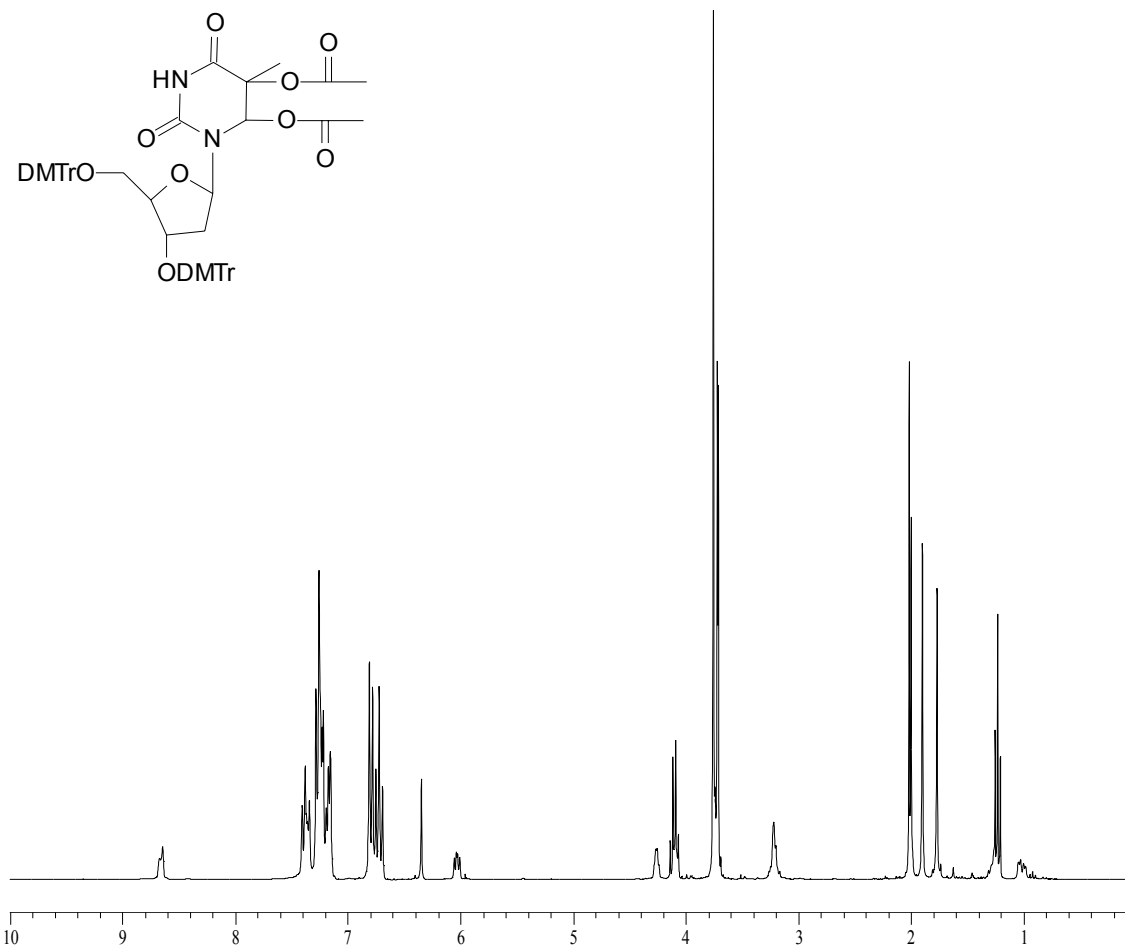

**Figure S3.**  $^1\text{H}$  NMR spectrum of **3** (400 MHz,  $\text{CDCl}_3$ ).



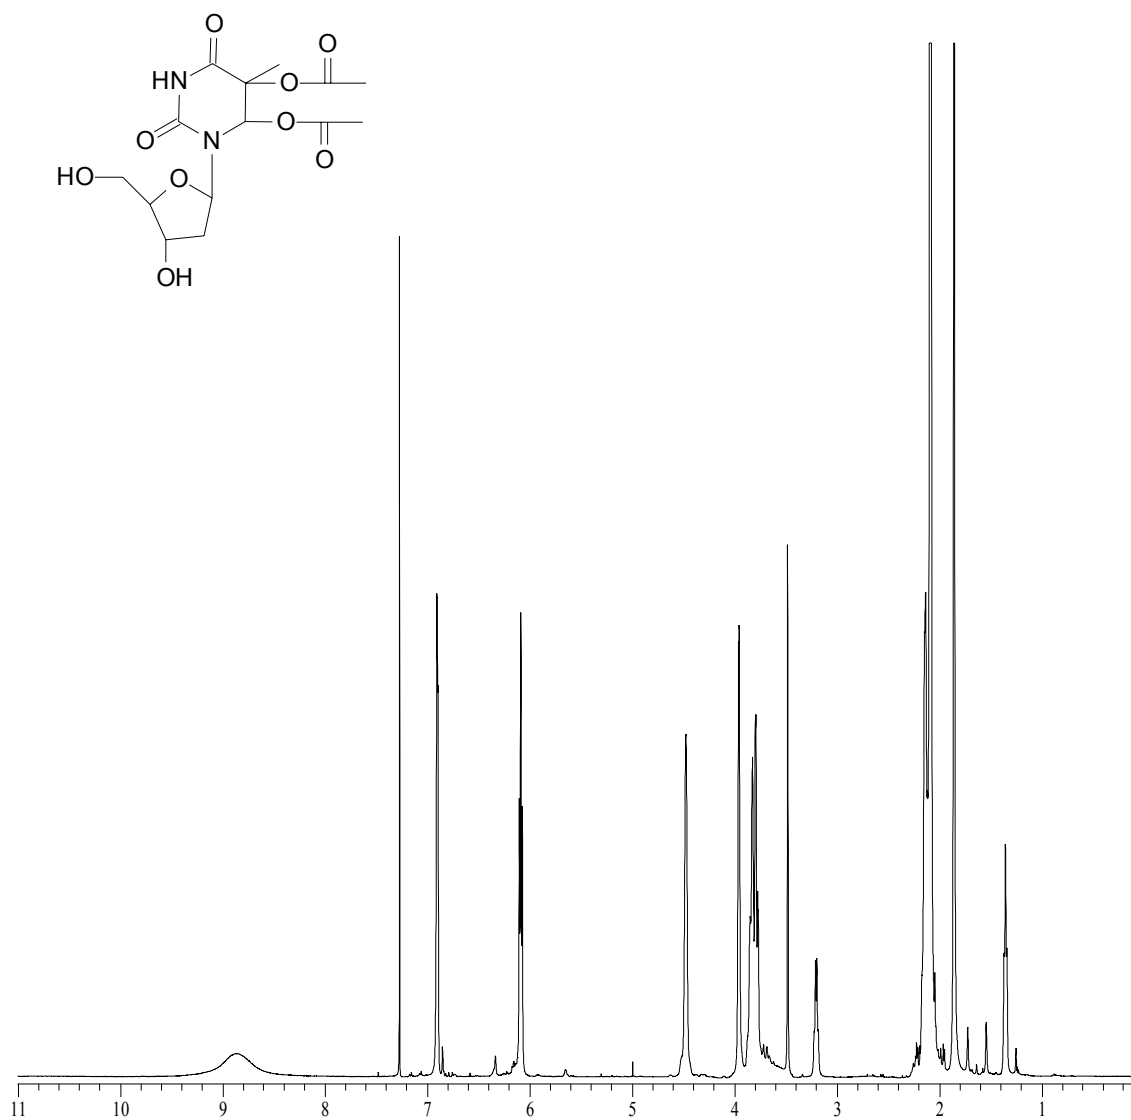

**Figure S4.** <sup>1</sup>H NMR spectrum of **4** (400 MHz, CDCl<sub>3</sub>).

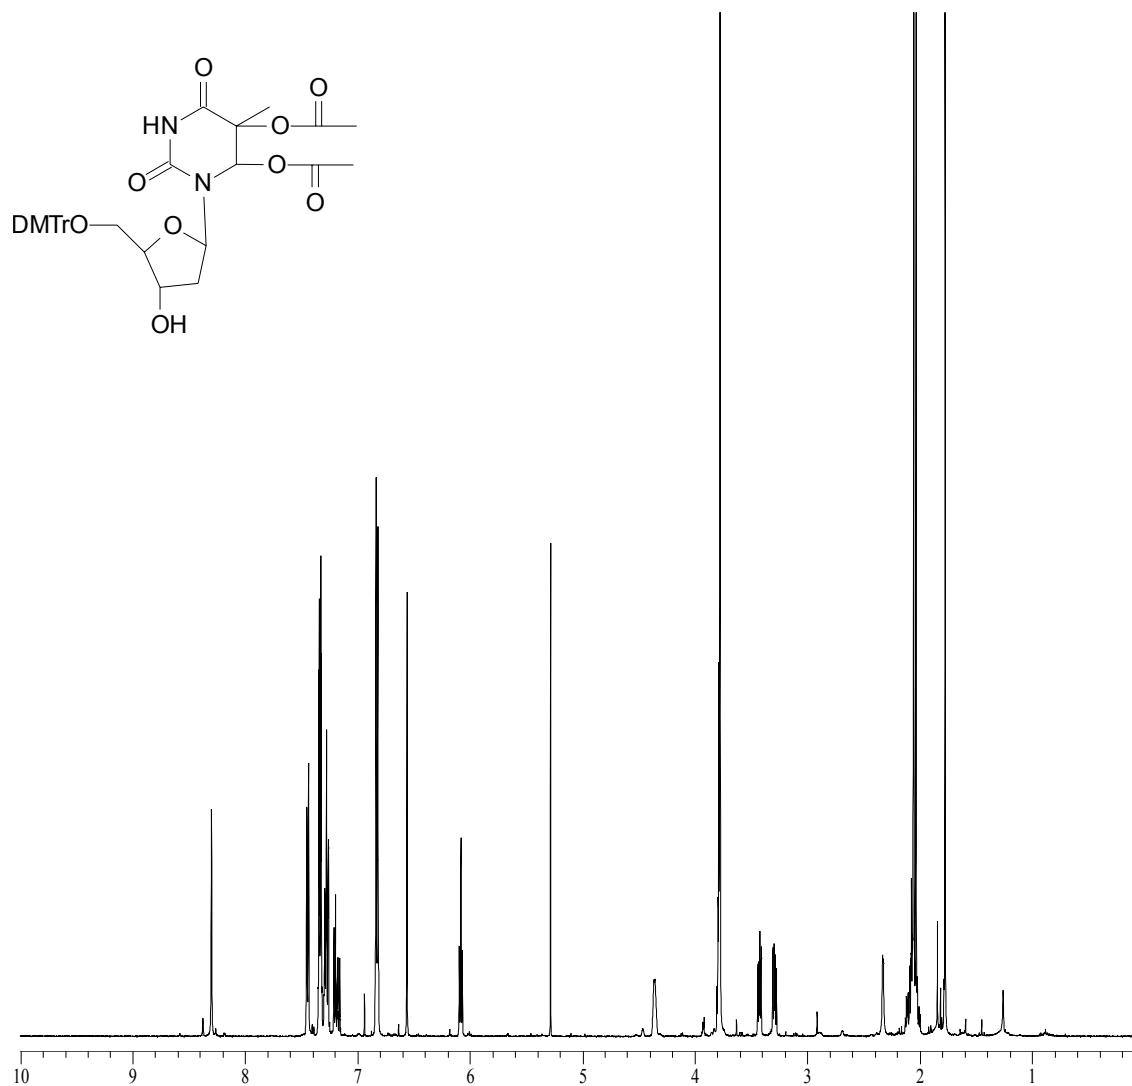

**Figure S5.**  $^1\text{H}$  NMR spectrum of **5** (400 MHz,  $\text{CDCl}_3$ ).

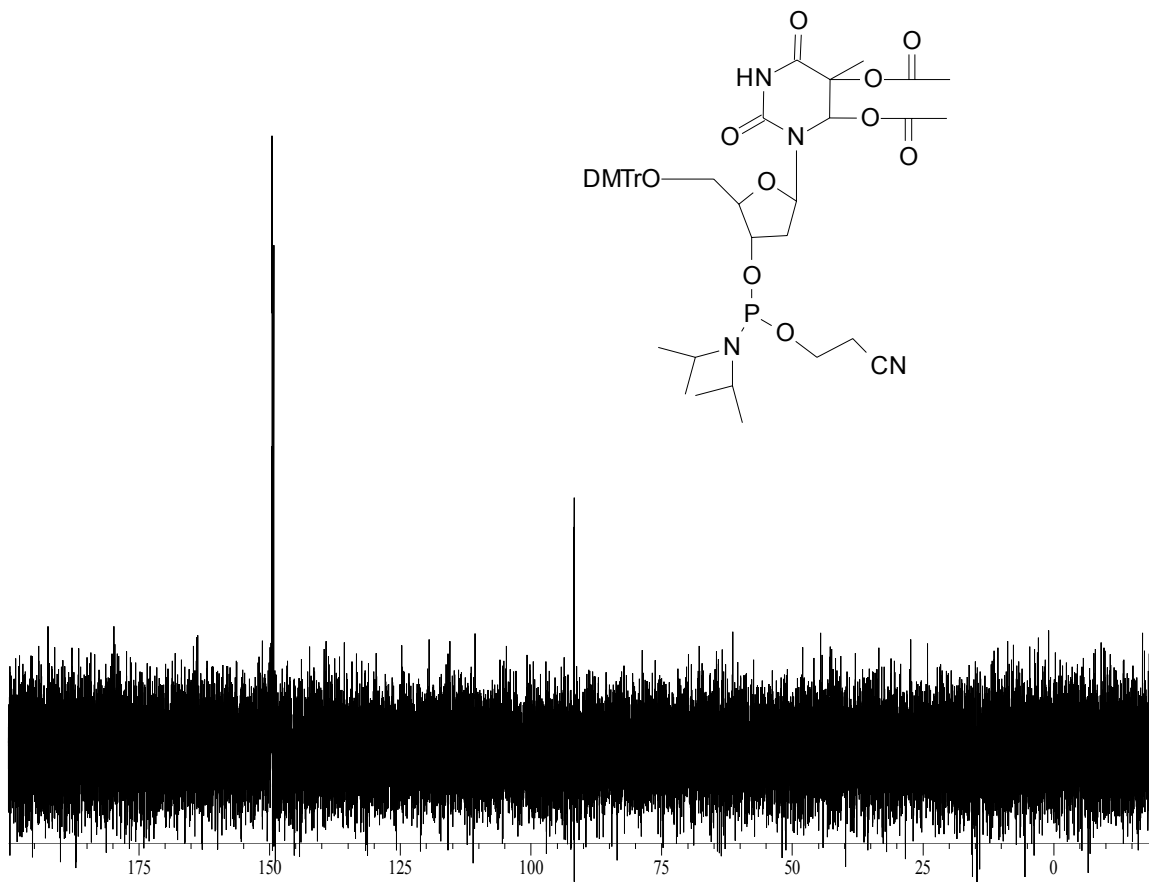

**Figure S6.**  $^{31}\text{P}$  NMR spectrum of **6** (400 MHz,  $\text{CDCl}_3$ ).

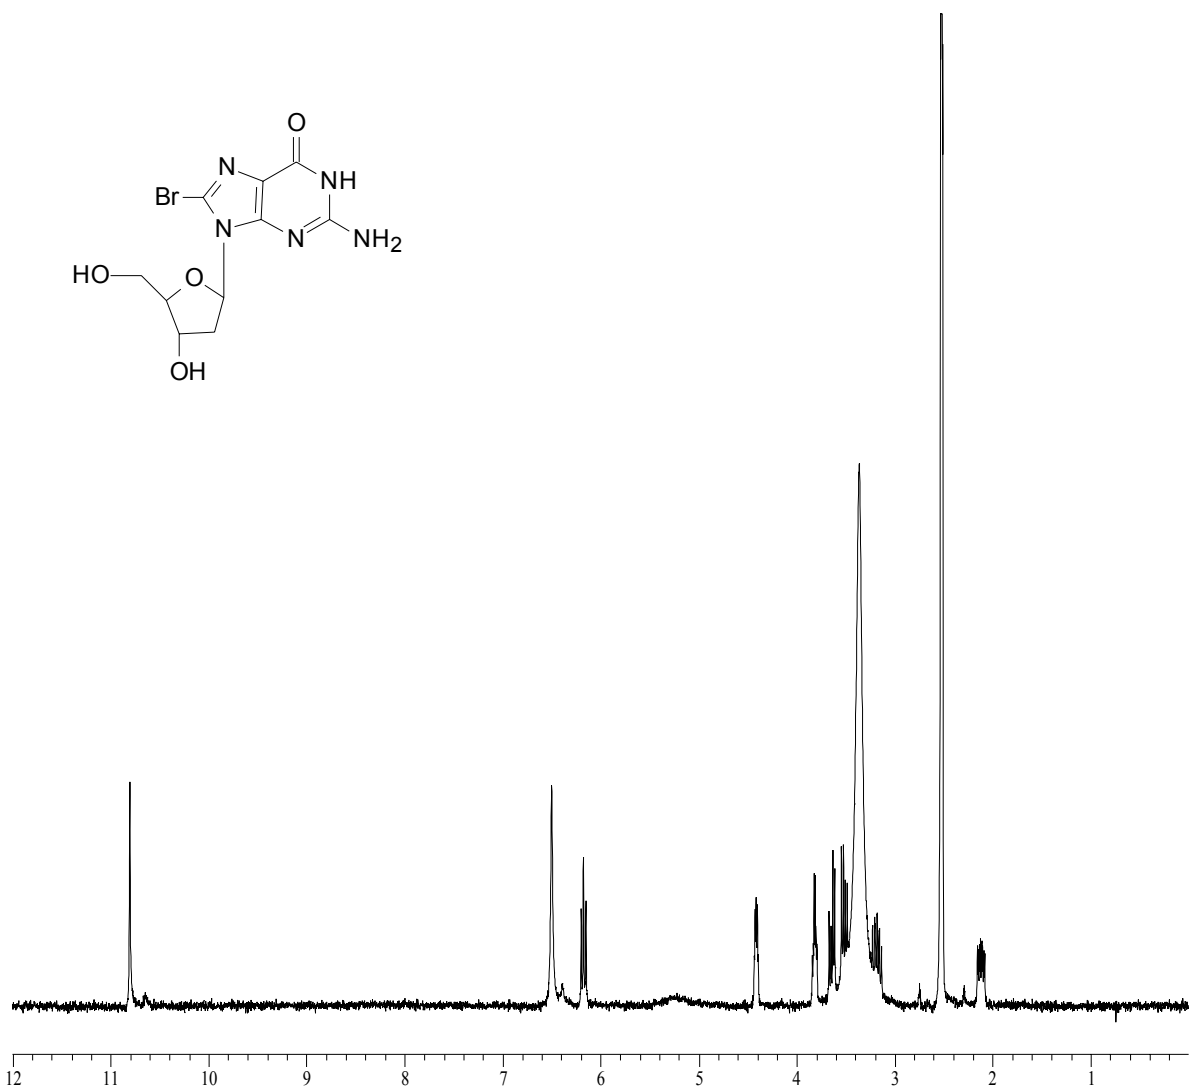

**Figure S7.**  $^1\text{H}$  NMR spectrum of 8-bromo-2'-deoxyguanosine (300 MHz,  $\text{DMSO-}d_6$ ).

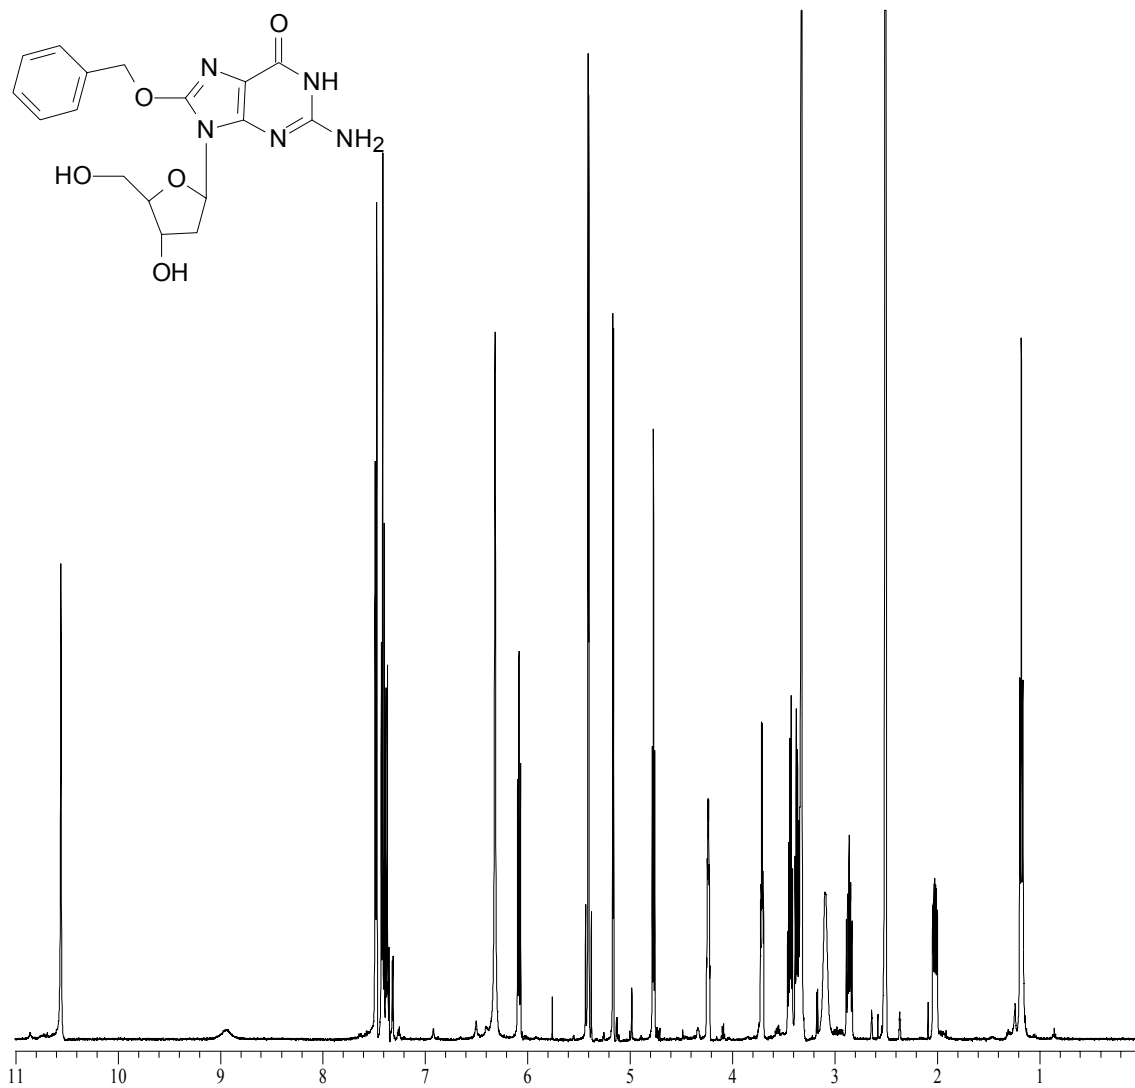

**Figure S8.** <sup>1</sup>H NMR spectrum of 8-benzyloxy-2'-deoxyguanosine (500 MHz, DMSO-*d*<sub>6</sub>).

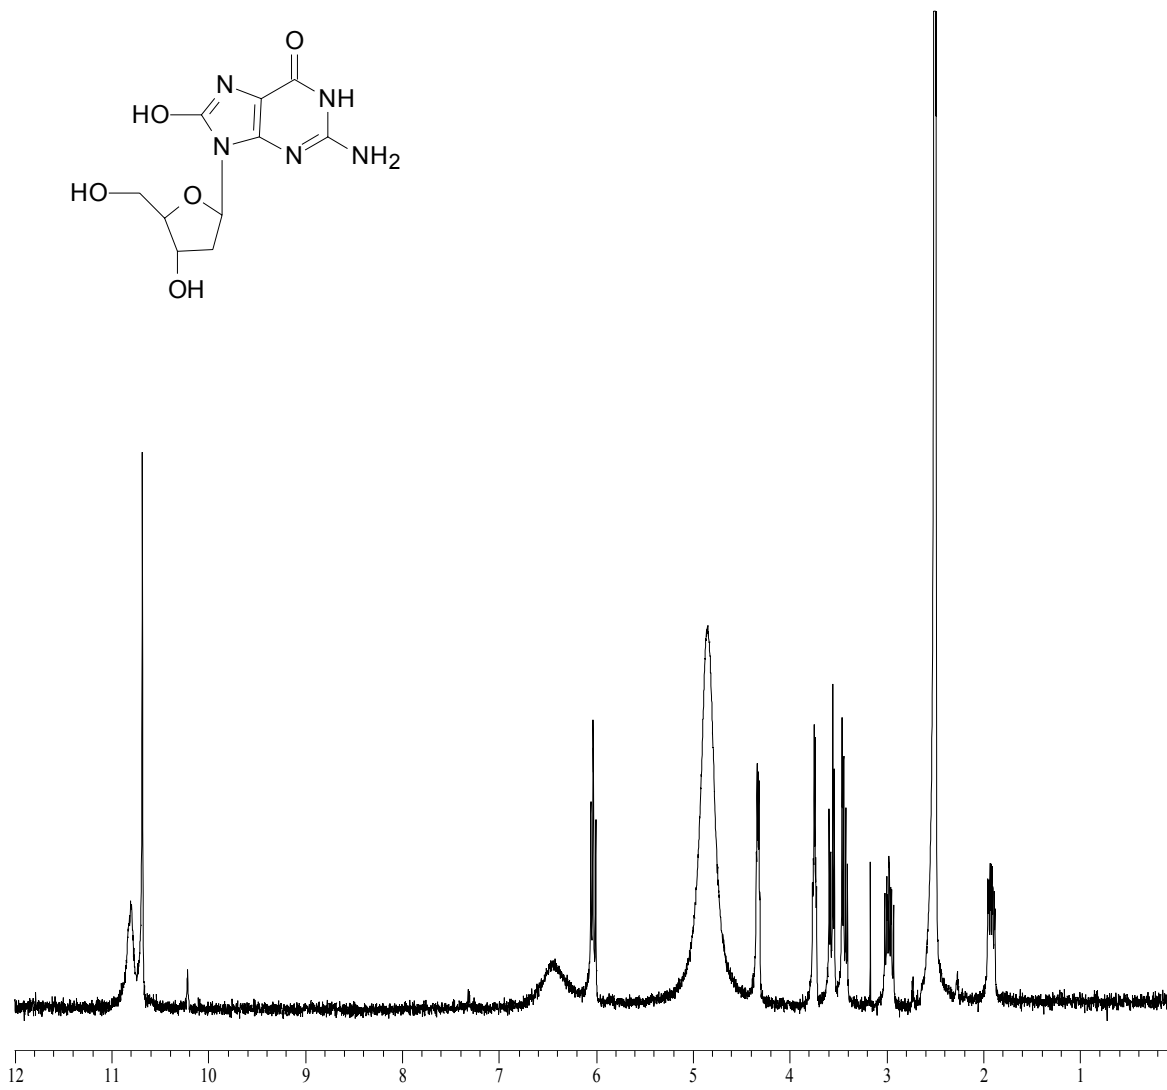

**Figure S9.** <sup>1</sup>H NMR of 8-oxo-2'-deoxyguanosine (300 MHz, DMSO-*d*<sub>6</sub>).

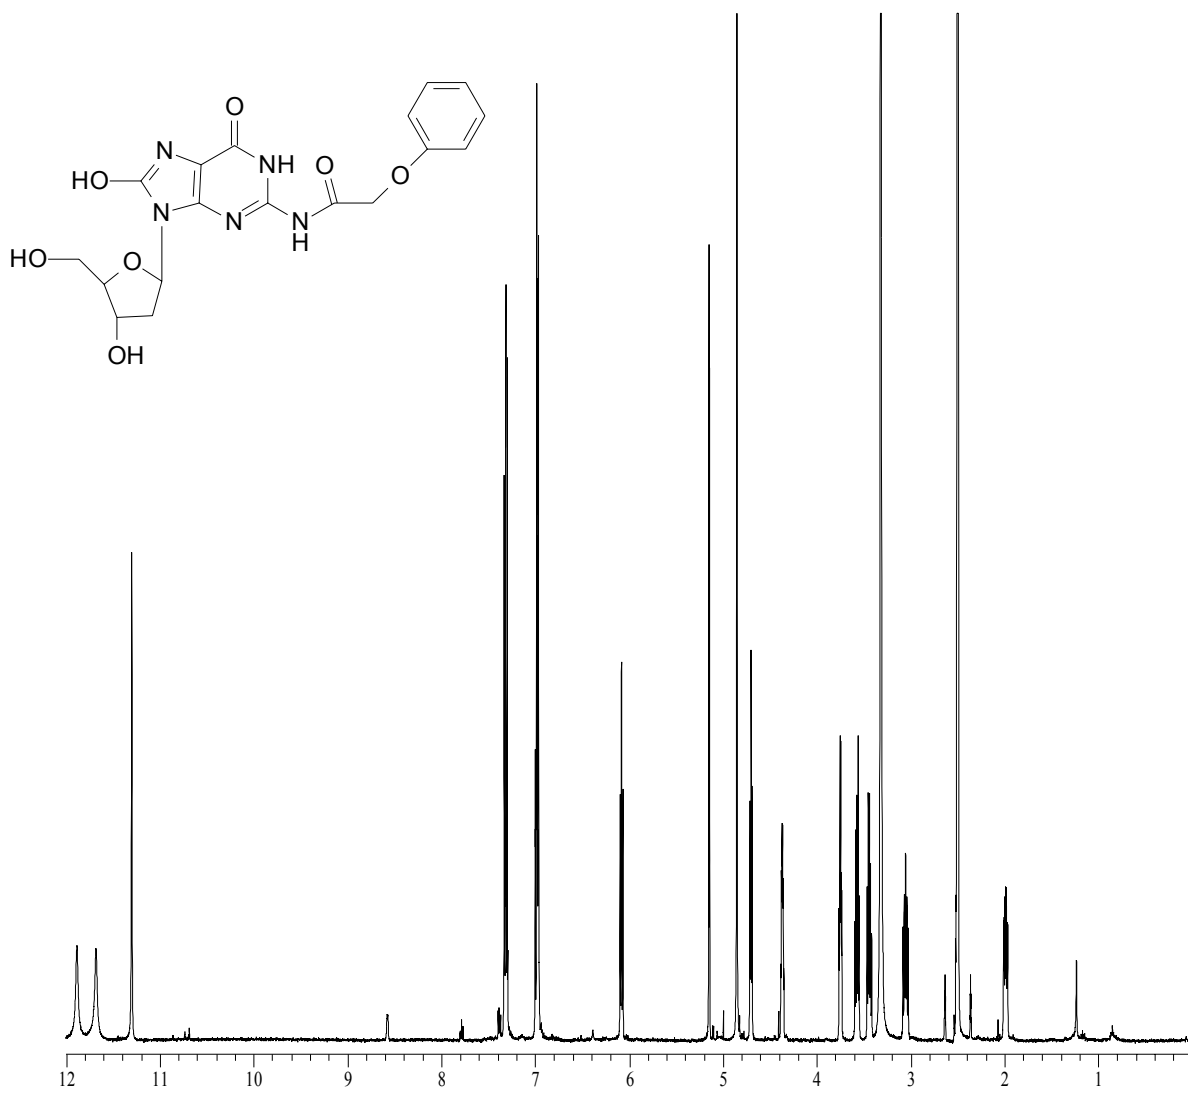

**Figure S10.** <sup>1</sup>H NMR of 2-N-(phenoxyacetyl)-8-oxo-2'-deoxyguanosine (500 MHz, DMSO-*d*<sub>6</sub>).

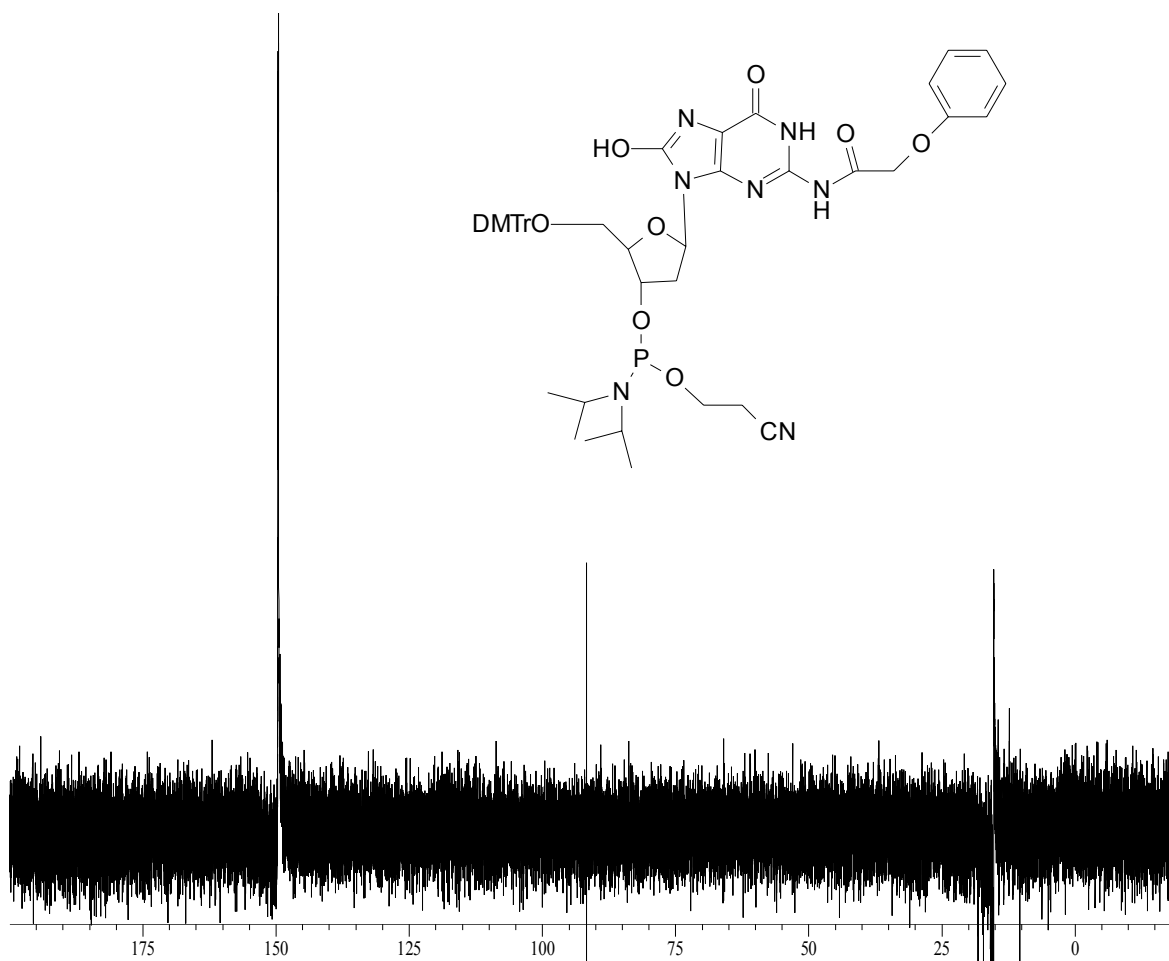

Figure S11.  $^{31}\text{P}$  NMR of 7 (400 MHz,  $\text{CDCl}_3$ ).



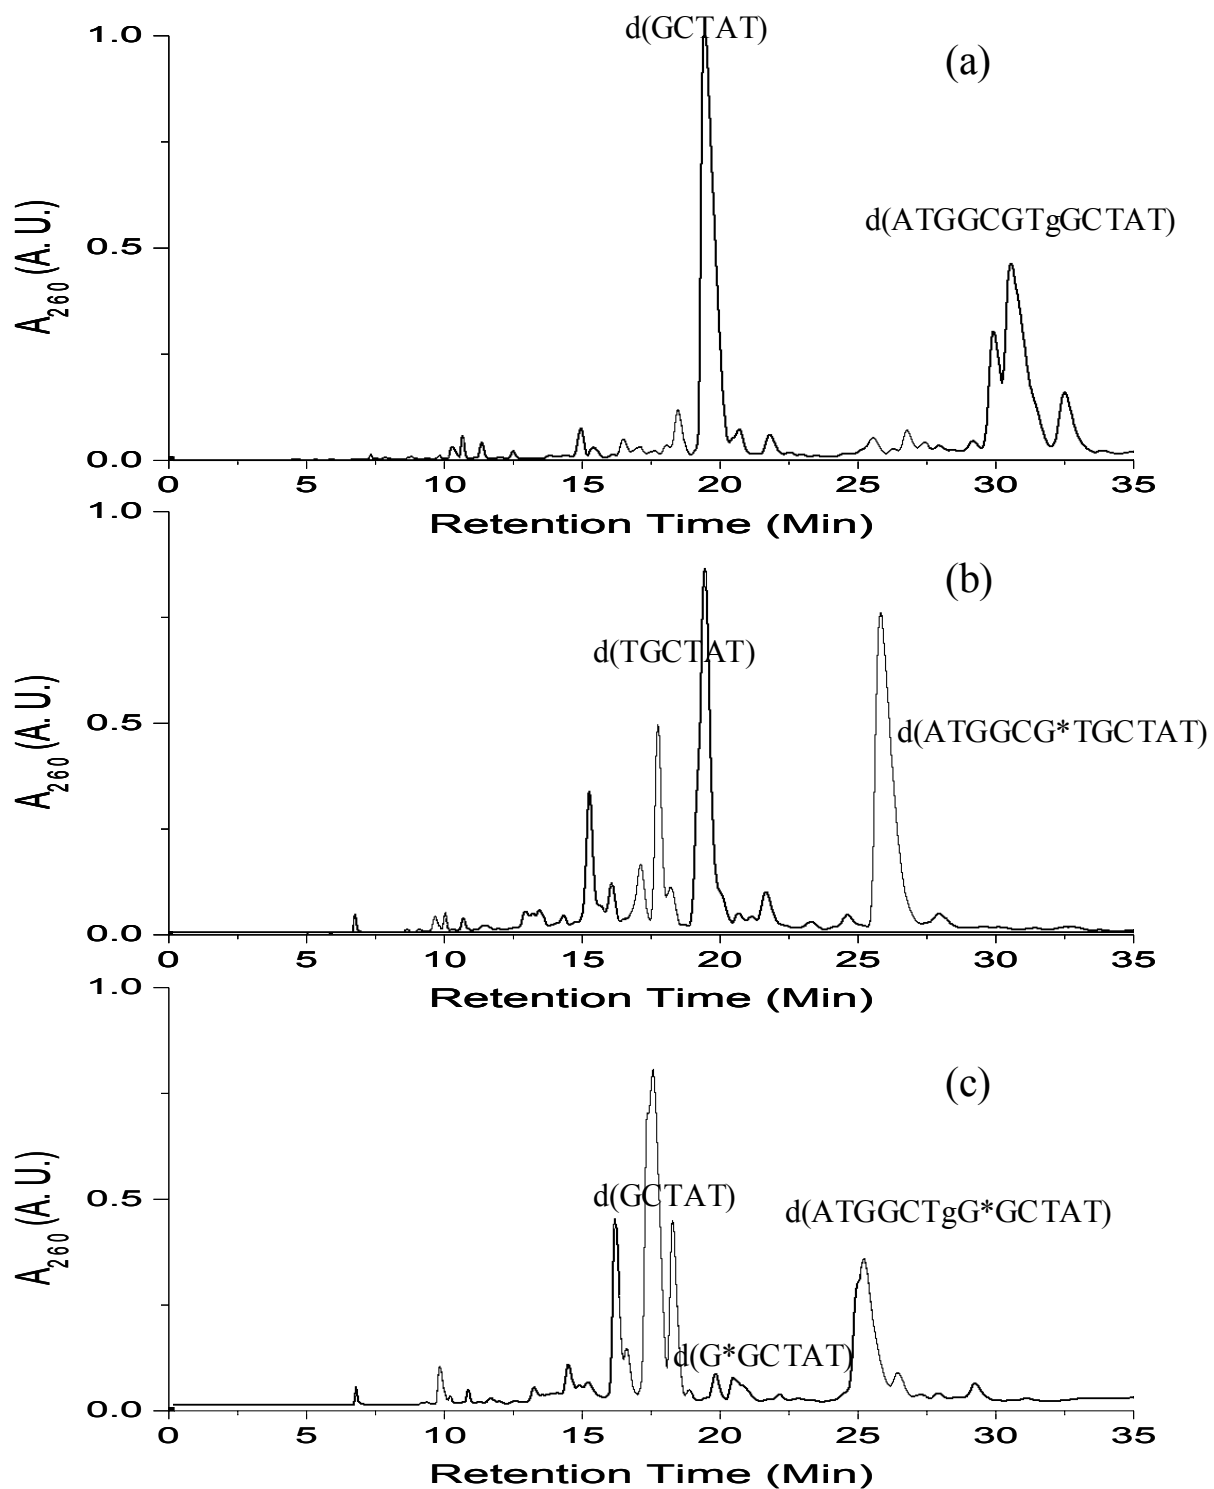

**Figure S12.** HPLC traces for the separation of the synthesized ODNs: (a) d(ATGGCGTgGCTAT); (b) d(ATGGCG\*TGCTAT), (c) d(ATGGCTgG\*GCTAT).

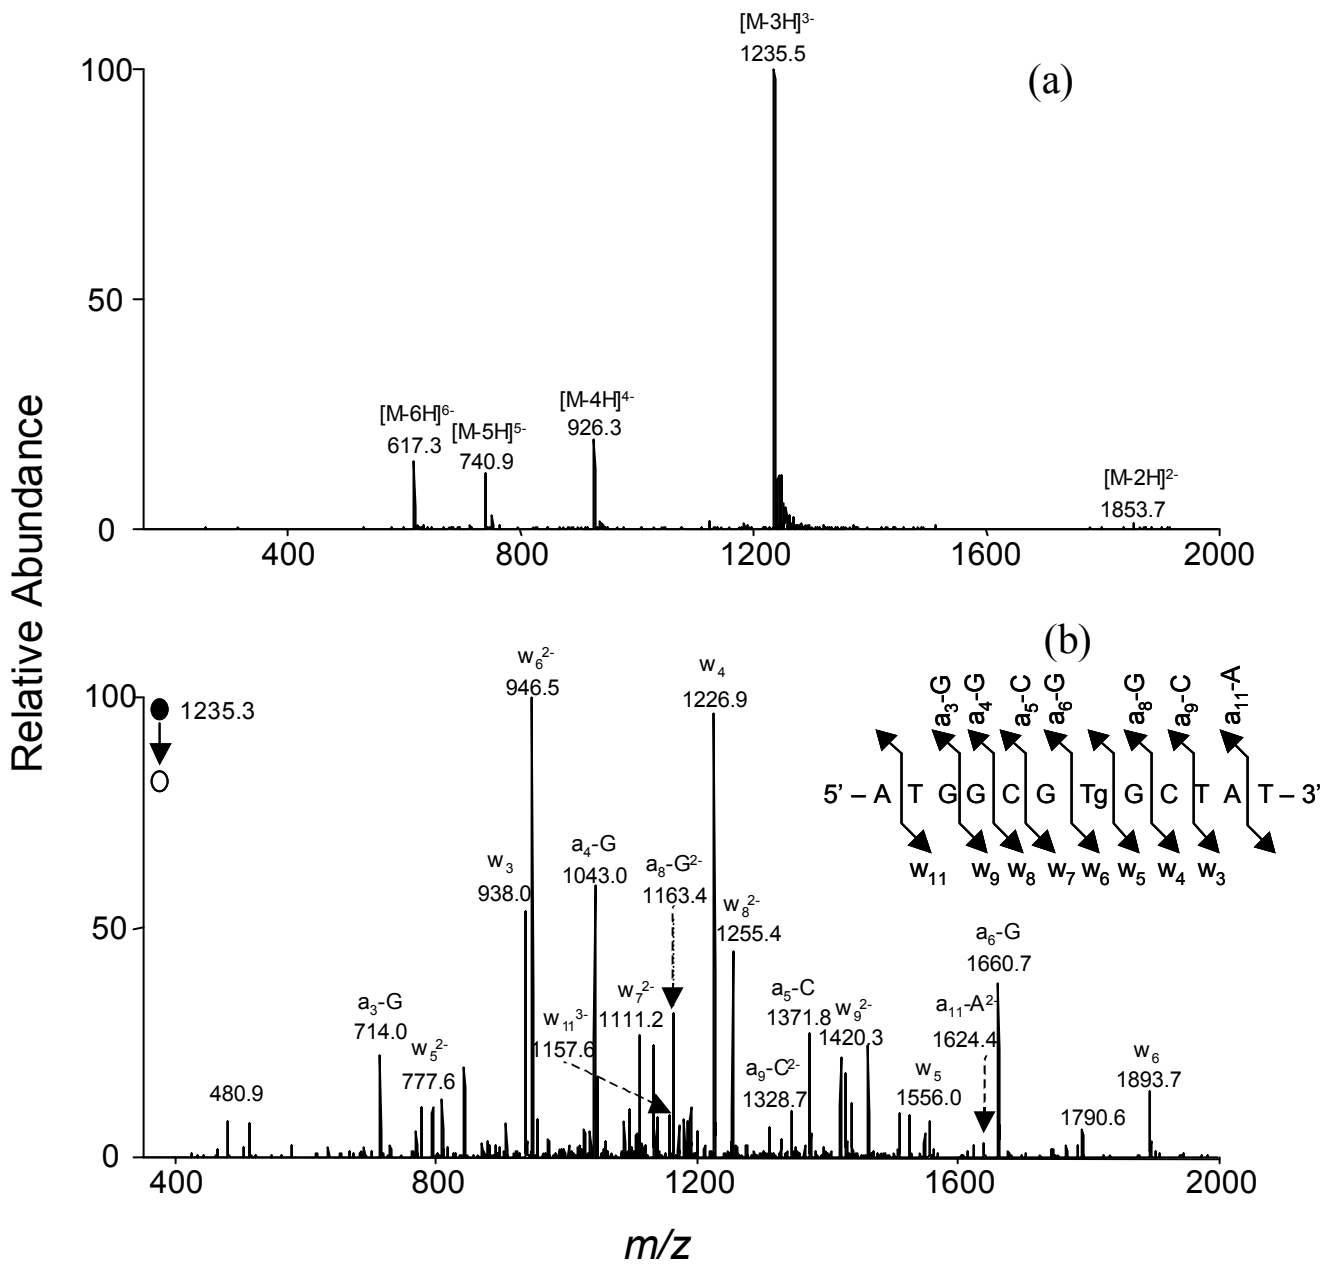

**Figure S13.** ESI-MS & MS/MS characterizations of d(ATGGCGTgGCTAT). (a) Negative-ion ESI-MS; (b) product-ion spectrum of the  $[M-3H]^{3-}$  ion ( $m/z$  1235).

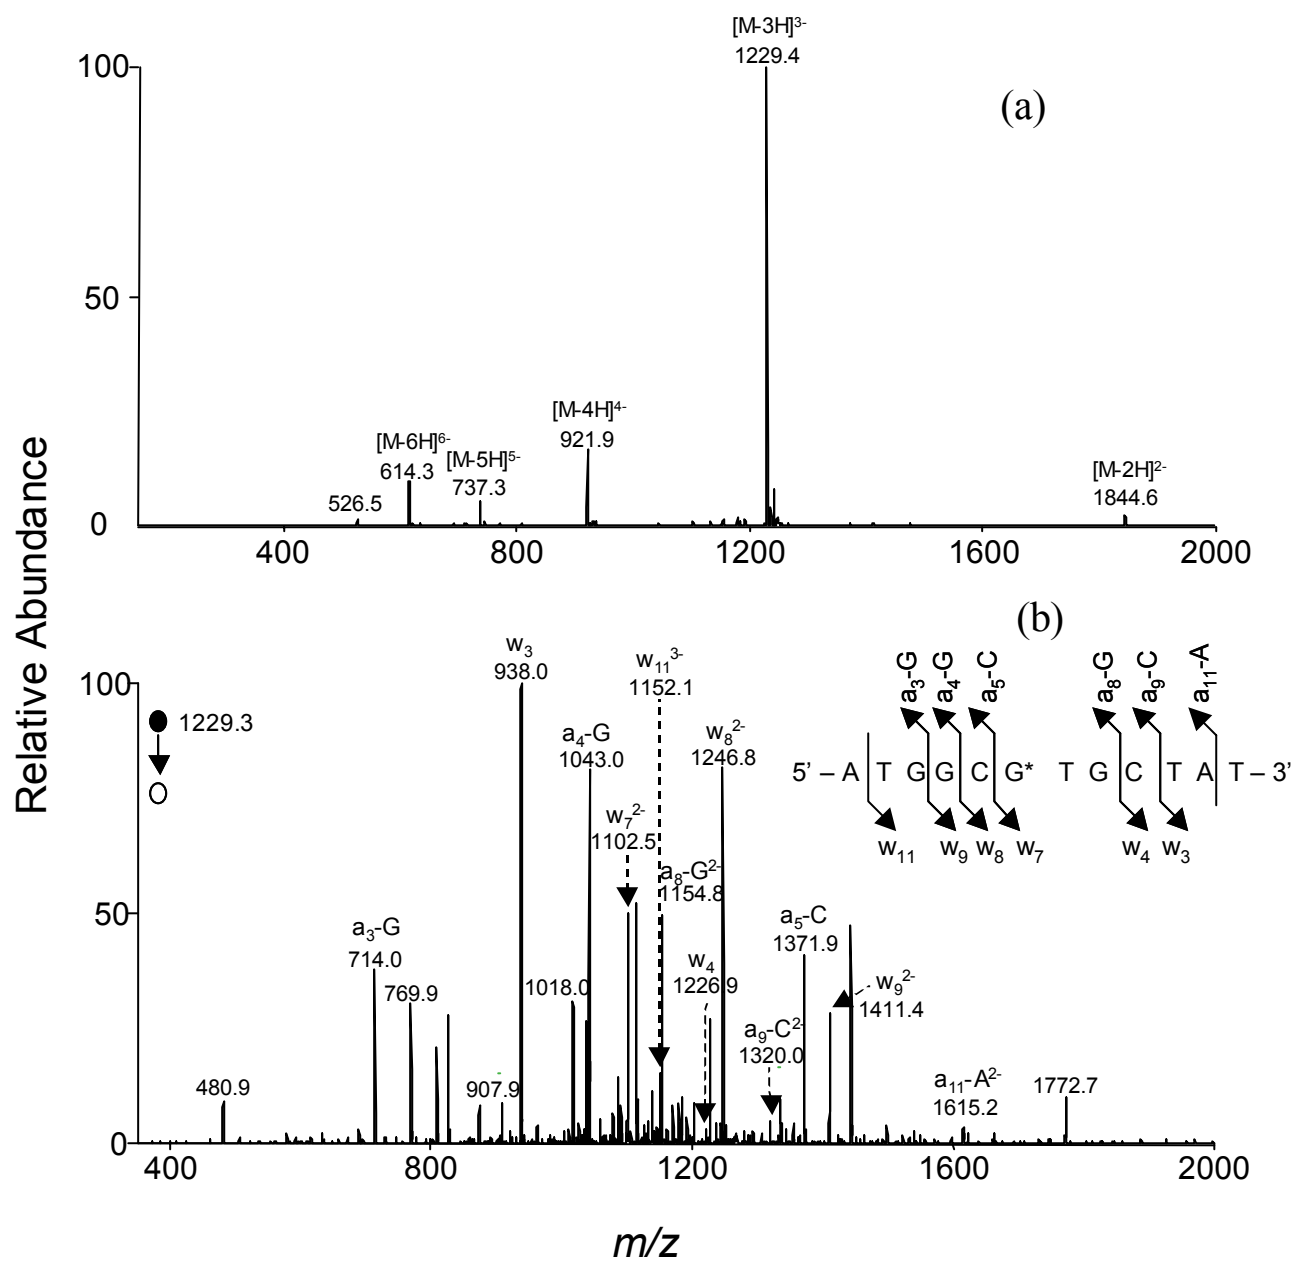

**Figure S14.** ESI-MS & MS/MS characterizations of d(ATGGC\*GTGCTAT). (a) Negative-ion ESI-MS; (b) product-ion spectrum of the  $[M-3H]^{3-}$  ion ( $m/z$  1229).

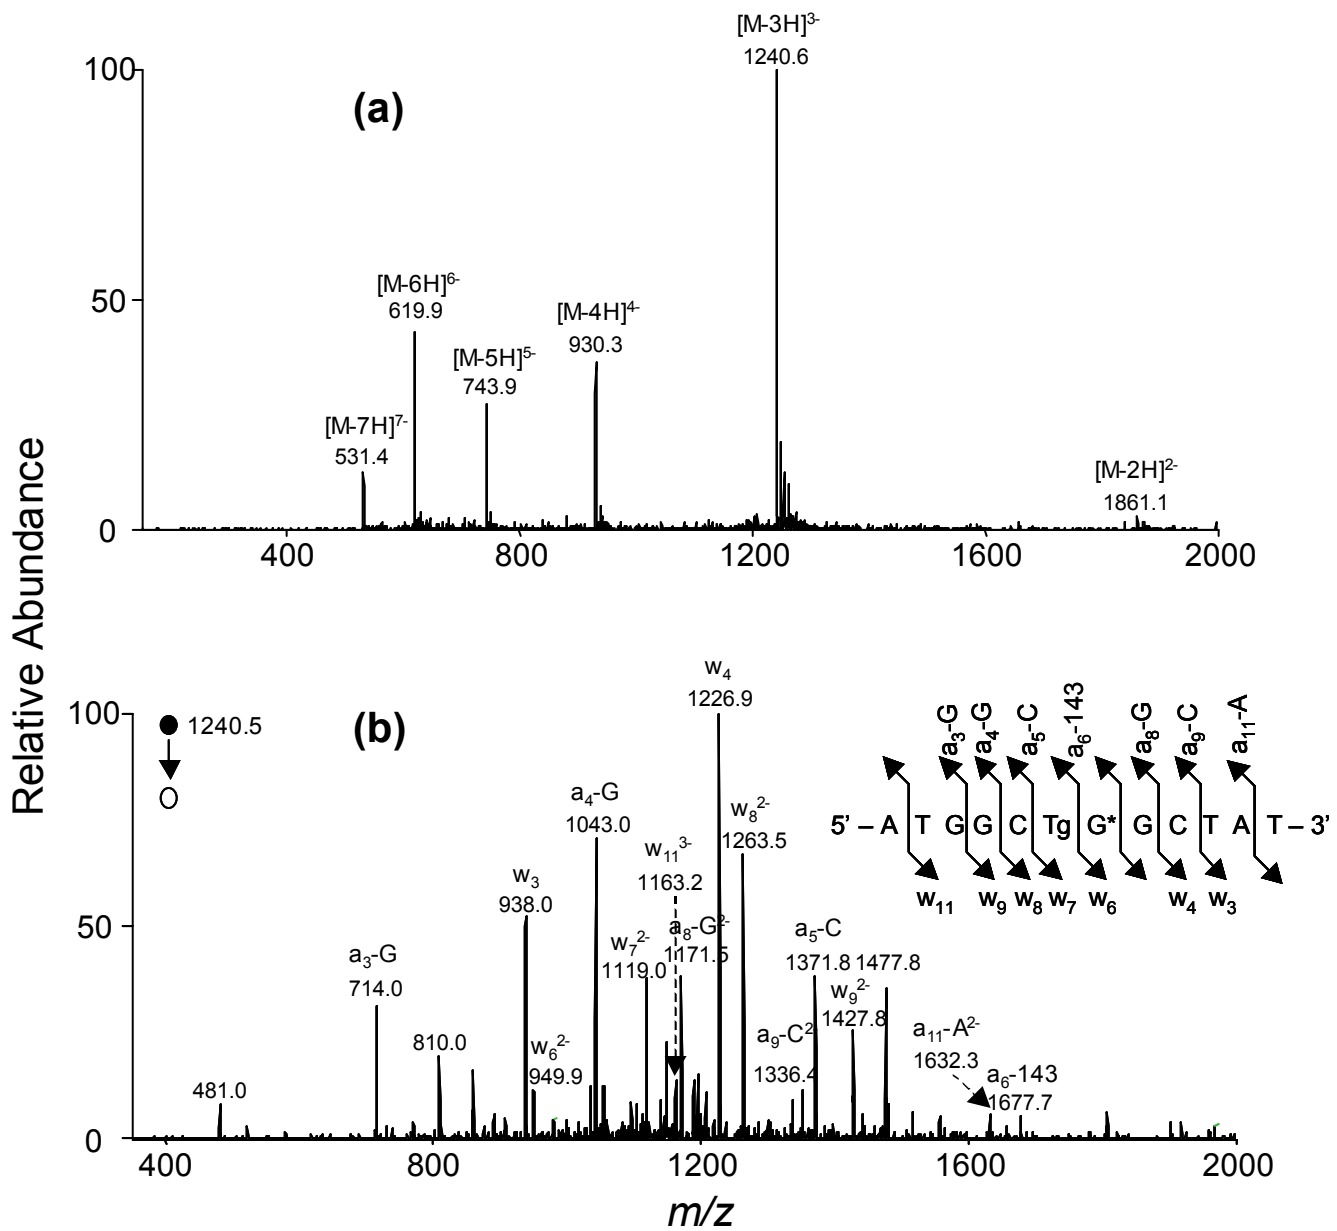

**Figure S15.** ESI-MS & MS/MS characterizations of d(ATGGCTgG\*GCTAT): (a) Negative-ion ESI-MS; (b) product-ion spectrum of  $[M-3H]^{3-}$  ion ( $m/z$  1241).

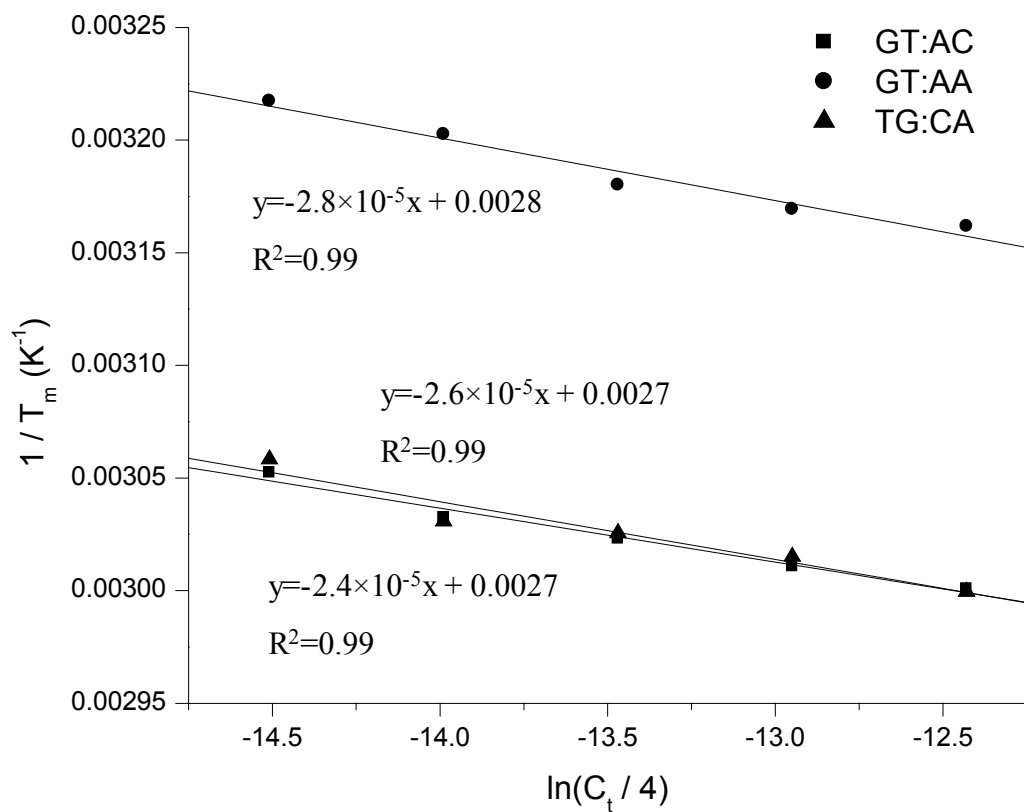

**Figure S16.** Plot of  $1/T_m$  vs  $\ln(C_t/4)$  for the unmodified duplexes. The duplex is  $d(ATGGCXYGCTAT)/d(ATAGCMNGCCAT)$ , where XY/MN represents GT/AC(■), GT/AA(●), TG/CA(▲).

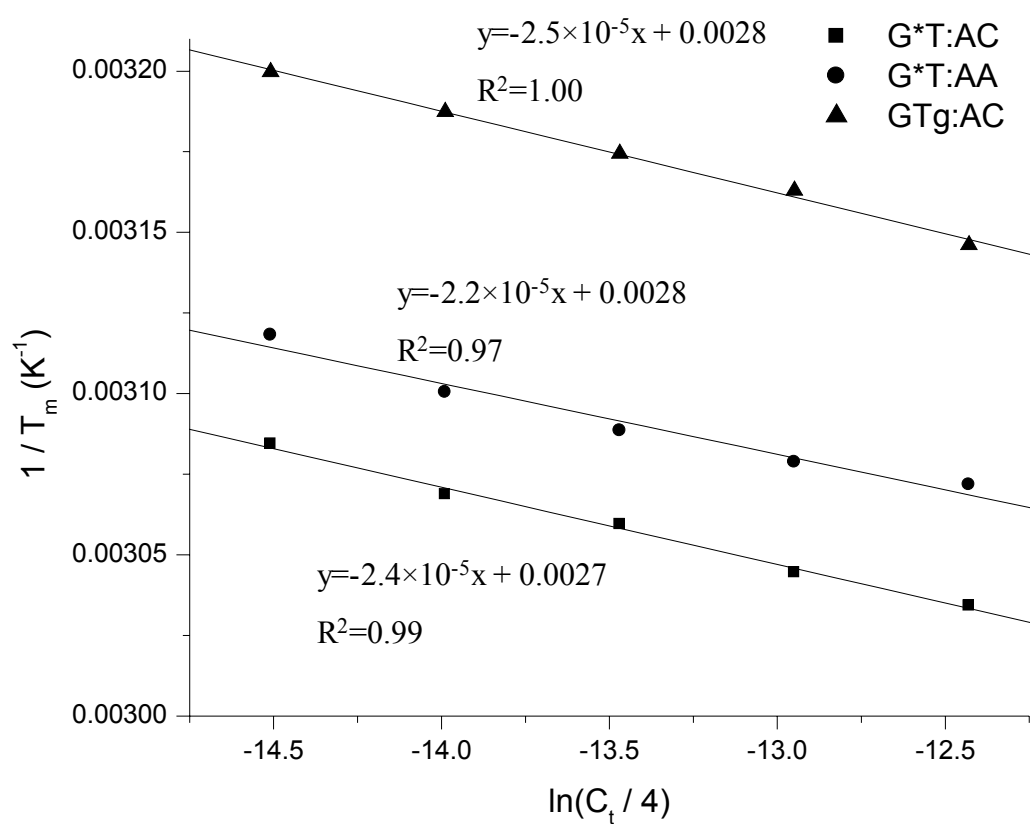

**Figure S17.** Plot of  $1/T_m$  vs  $\ln(C_t/4)$  for the duplexes including single damaged lesion. The duplex is  $d(ATGGCXYGCTAT)/d(ATAGCMNGCCAT)$ , where XY/MN represents G\*T/AC(■), G\*T/AA(●), GTg/AC(▲).
